# Supplementary material for: Charge Your Brainzzz: the systematic development of a whole systems action program promoting sleep health in adolescents
Source: Research Square preprint supplement (doi:10.21203/rs.3.rs-5919594/v1), 2025-01-31
Supplement: Supplementary file 2 [file 2b760664aeb2cb7c9b2d7533.docx]

**Box 1. The Healthy School Approach**

In the Netherlands, the Healthy School approach provides a central public health infrastructure to implement health promotion initiatives (Bartelink et al., 2022). The approach is funded by the Dutch government and is nationally coordinated by the Association of Public Health Services (GGD GHOR Nederland), the National Institute for Public Health and the Environment (RIVM), and the primary, secondary, and vocational education councils (in Dutch: PO-Raad, VO-Raad, and MBO Raad). The Dutch Healthy School Approach provides a structured yet flexible framework for integrating health promotion activities within Dutch primary and secondary schools. Based on the WHO’s Health Promoting School Model (Langford et al., 2014), it focuses on targeting four ‘pillars’ per health topic to achieve health behavior changes, i.e., (1) health education, (2) a healthy social and physical school environment, (3) healthy school policies, and (4) monitoring and early detection of specific health or health behavior issues among children that warrant special attention or care of other health professionals (Bartelink et al., 2022). Sleep health was recently adopted as one of the ten core Healthy School topics with no intervention program(s) available to address it. Given this and the fact that several impactful causal mechanisms and leverage points to influence adolescent sleep health involve the school setting (Heemskerk et al., 2024), we aimed to align the CYB program with the Healthy School framework. This will also facilitate future implementation of the program.
