# Supplementary material for: Charge Your Brainzzz: the systematic development of a whole systems action program promoting sleep health in adolescents
Source: Research Square preprint supplement (doi:10.21203/rs.3.rs-5919594/v1), 2025-01-31
Supplement: Supplementary file 3 [file 39a3535037bdf4b32be9f79a.docx]

Table 3. Overview of the Charge Your Brainzzz program components, theoretical methods and practical applications

| **Program components** | **Theoretical Methods** | **Practical applications/ Tools** |
| --- | --- | --- |
| **Healthy School Pillar: Health education** |  |  |
| **Charge Your Brainzzz – educational program**  An education component, consisting of four complementary lessons for first-year pre-vocational secondary school students aimed at conveying the importance of sleep, raising awareness regarding the significance of sleep, eliciting the causes of poor sleep, equipping students with strategies to improve their own sleep and sleep hygiene practices, and reflecting on first attempts to improve sleep and sleep hygiene practices. | Belief selection, Persuasive communication, Active learning, Individualization, Modeling, Feedback, Reinforcement, Facilitation, Nudging, Chunking, Discussion, Providing cues, Consciousness raising, Framing, Counterconditioning, Implementation intentions, Planning coping responses, Early commitment, Public commitment, Environmental reevaluation, Arguments, Direct experience, Resistance to social pressure, Guided practice, Self-monitoring of behavior, Provide contingent rewards, Cue altering, Public commitment, Goal setting, Planning coping responses, Entertainment education | The lessons utilize interactive methods. Each lesson started with a video with role models that introduced the topic of the lesson and served as a conversation starter. All lessons ended with a "challenge" with their classmates, teacher and/or parents wherein they made an action plan on reducing screen use, doing relaxation activities before sleep and on sleep hygiene practices, For example, after the lesson on screen use, the students committed to a class challenge, the T-day Challenge, to encourage adolescents to leave their phones outside their bedrooms on days that start with a T (i.e., Tuesdays and Thursdays) to reduce evening screen use (based on the study (Vandendriessche et al., 2023).  Lesson 1: “Charge Your Sleep” focuses on becoming aware of their personal sleep schedules and the importance of sleep. It includes interactive activities such as a sleep mask quiz with yes/ no statements about the importance of sleep and the consequences of inadequate sleep, fact or fiction statements, exercises within a workbook, and a “Charge Your Sleep- challenge”, where students set a specific goal to improve their sleep. They identify their intention, they set a sleep goal and plan when and how they will achieve this goal, and who can support them.  Lesson 2: “Charge Your JOMO” (i.e., Joy of Missing Out) focuses on the impact of evening screen use and social media on sleep. The lesson starts with a reflection on the previous challenge, with questions such as: *“Did you complete your challenge from the previous lesson? What went well? What did you still find difficult? How will you address this next time?”*. Students learn about how social media and screen use can influence sleep and participate in a dilemma game where they choose between two options that indirectly discourage screen use while providing alternatives for screen-free activities. The lesson also includes a video, workbook exercises and introduces the “T-Day Challenge,” where students set a specific goal to decrease their evening screen use.  Lesson 3: “Charge Your Chill Skills” focuses on the impact of stress and mental wellbeing on sleep. The lesson starts with a reflection on the T-Day challenge and a video. Students then complete a “stress meter” in their workbook to become aware of how stressed they feel and identify their stress triggers. Next, they reflect on activities that help them relax, learn the “military sleep method” to reduce overthinking and fall asleep more quickly, and create a campaign for a “chill advertisement”. The lesson ends with the introduction of the “Me-Day Challenge”, where students are challenged to try out various relaxation activities to find what works best for them.  Lesson 4: “Charge Your Dreams” focuses on reviewing and summarizing the material from previous lessons, helping students to identify practical tips to improve their sleep, and strategies to maintain these habits over time. The lesson begins with a reflection on the Me-Day Challenge and includes a video where students analyze the sleep hygiene of a role model, identifying what the role model is doing well and what needs improvement. Students then participate in a “Survival of the Fittest” quiz puzzle to test their knowledge of sleep facts, followed by a fact-or-fiction quiz. The lesson ends with a Sleep Challenge, where students select two personalized challenges to further enhance their sleep habits. |
| **Healthy School Pillar: School policies** |  |  |
| **Step-by-step guide for forming and implementing school sleep health policies**  A step-by-step guide for Healthy School Advisors and schools to assist and inform school boards in formulating and implementing school sleep health policies. This guide aims to enhance self-efficacy and foster positive beliefs about the benefits and feasibility on the policy measures. | Belief selection, Modeling, Consciousness raising, Technical assistance | The guide includes insights and experiences form other schools, detailing how they successfully implemented specific policy measures and their outcomes. The step-by-step guide includes policies with regard to:   - (Digital) Communication strategies; e.g., not sending students late-night messages regarding schedules, test results and other school-related information; - Adjusting test schedules; ensuring that the school does not schedule tests in the early morning hours; - Modifying school start times; ensuring that students start times are aligned with their age i.e., biorhythm.   In addition to offering guides with practical strategies for adopting, implementing, and sustaining these policy measures, the CYB-team provides a support and implementation dialogue on how these policy measures can be implemented within the school. It also includes general information about the importance of the policy measures, a FAQ, and shared experiences from other schools that have successfully implemented them. |
| **Healthy School Pillar: Social and physical environment** |  |  |
| **A parent information evening**  The parent information evening aims to raise awareness about the importance of sleep and to provide parents with information about how to improve their teenagers’ sleep health. Topics covered include: the importance of good sleep, how to establish agreements with your teenager about bedtimes and screen use, and what the recommended bedtimes are for this age group.  **An online magazine**  The E-zine is a digital magazine that serves as a reference guide for parents. It offers advice and practical tips to help parents and caregivers guide their teenagers towards better sleep. | Belief selection, Modeling, Chunking, Discussion, Consciousness raising, Information about others’ approval | An engaging and interactive parent (or caregiver) information session to be held at school, focusing on key topics such as teenage brain development, the biological mechanisms of sleep, and parenting sleep practices to support healthy adolescent sleep. It lasts about an hour and provides parents with insights and practical tips on positively influencing their teen’s sleep, stress, and screen use. The presentation is supported by videos of experts on sleep and on parenting, a video with a role model play on making agreements, fact-or-fiction quiz and discussions within the group. The E-zine is a digital magazine that can be found on the website of Charge Your Brainzzz covering the same information as the parent information evening supplemented with references to the ‘Teen Sleep Guide’ and the ‘Teen Sleep Check’. |
| **The ‘Teen Sleep Check’** (Dutch: SlaapCheck Tiener)  An online tool for parents to become aware of their teenager’s sleep health and sleep hygiene practices and to acquire knowledge about how to improve their teenagers’ sleep hygiene practices.  **The ‘Teen Sleep Guide’** (Dutch: Slaapwijzzzer)  An online tool for parents to acquire knowledge about healthy sleep hygiene practices during the day. | Belief selection, Persuasive communication, Individualization, Chunking, Consciousness raising, Framing, | Based on their response on a series of questions part of the Teen Sleep Check, parents receive an advice to improve their teenagers’ sleep, such as creating a good sleep environment, no screens within the bedroom, and emphasizing the importance of a consistent sleep routine.  The Sleep Guide offers practical tips on healthy sleep hygiene practices during daytime that parents can promote amongst their teenager to ensure a better night's sleep. |
| **Monitoring and screening** |  |  |
| **Tool for monitoring sleep health and early detection of sleep (behavior) problems**  Teachers, school care coordinators and youth healthcare professionals in secondary education play a crucial role in identifying when students have sleep difficulties and to refer them to the appropriate healthcare. The aim of this CYB monitoring and screening tool is to provide guidance on recognizing sleep difficulties in students, initiating conversations with the student (and possibly their parents/guardians), and, if needed, referring the student to appropriate healthcare, in general the youth doctor or general practitioner. | Participation, Tailoring, Individualization, Using imagery, Elaboration, Consciousness raising, Planning coping responses, Self-monitoring of behavior, Goal setting, Planning coping responses | The tool includes:   - A guide with detailed information on why sleep is so important for teenagers, how to recognize sleep deprivation, potential underlying causes, and recommended advice; - A screening questionnaire to help identify sleep difficulties in students; - A conversation tool to uncover the primary causes of sleep deprivation in the student. This tool includes a desk pad featuring a timeline and stickers pre-printed with sleep hygiene practices that teenagers can use to map out their afternoon, evening, night and morning routine. |
