# Supplementary material for: Charge Your Brainzzz: the systematic development of a whole systems action program promoting sleep health in adolescents
Source: Research Square preprint supplement (doi:10.21203/rs.3.rs-5919594/v1), 2025-01-31
Supplement: Supplementary file 4 [file 5932813773f442b36929fd3d.docx]

Table 1. Desired System Dynamics Outcomes and Performance Objectives – School environment subsystem

| **Desired system dynamics outcomes:**  **School environment** | **Performance objectives*** |
| --- | --- |
| - Adolescents limit doing evening homework - Adolescents do not experience difficulties planning their homework - Adolescents perceive less performance pressure from school | - **Adolescents** plan (with help of their **parents**) their daily activities in such a way to prevent homework in the evening - **Teachers** avoid assigning homework for the following day - **Teachers** communicate homework details in time, at the latest at 4:00 PM - **Schools** have a policy stating to assign little to no homework for the next day - **Schools** create a structure to provide support and guidance to adolescents in completing homework on time - **Schools** aim toprovide support and guidance to adolescents in completing homework on time - **Schools** become aware that managing and planning homework can be particularly challenging for teenagers, given their developing organizational skills and competing priorities |
| - Late-night school deadlines are prohibited | - **Teachers** avoid setting late-night school deadlines - **Schools** implement a policy that restricts late-night school deadlines - **Schools** become aware that late-night school deadlines damage students’ sleep health, which in turn is crucial for their cognitive development, mental wellbeing and physical health as well as damaging their right to leisure time after school hours to keep a healthy school-private life balance and protect their mental wellbeing |
| - Homework is coordinated between teachers about when and how much homework they give | - **Teachers** coordinate homework assignments and exams with other subjects to prevent workload peaks - **Schools** schedule no exam weeks, but rather distribute exams evenly throughout each trimester to prevent peaks in workload and subsequent stress with students - **Schools** utilize one digital platform for communication and sharing homework assignments with adolescents to prevent unexpected workload peaks |
| - School schedules are aligned with adolescents’ biorhythm (e.g. starting- and end times, breaks) | - **Schools** implement a policy that states that they align school schedules with adolescents’ biorhythm (e.g., start times and end times, breaks) - **Schools** implement a policy that tests or examinations do not take place before 11:00 AM - **Schools** aim to align school schedules with students’ biorhythm - **Schools** become aware of the impact of school start time on sleep and cognitive development of adolescents, and the importance of better aligning school start times with adolescent biorhythm |
| - Schools do not digitally communicate about e.g., homework in the evening | - **Teachers** do not specify the exact day and time that they will publish students' test scores and grade - **Teachers** do not digitally communicate in the evening - **Teachers** become aware about the effect of evening communication and specifying the exact day and timing of grade publication on sleep health to strengthen the belief that this anticipation causes stress and in turn affects sleep health - **Schools** implement a policy that prohibits teachers from specifying when test grades will be published - **Schools** set their digital (mobile) applications to limit the accessibility of students to the online grading and test scores system between 8:00 PM and 8:00 AM - **Schools** implement policies that prevent sending students notifications as well as to prevent them from accessing the online test scores and grading system between 8:00 PM and 8:00 AM - **Schools** only use digital (mobile) applications that allow for sending students messages at preset times - **Schools** become aware that evening notifications (e.g. communicating test results) causes students stress that in turn negatively affects their sleep health - **Schools** become aware that their students have the right to leisure time after school hours to keep a healthy school-private life balance and protect their mental wellbeing |
| - Sleep health and teaching relaxing sleep hygiene practices are part of the school curriculum - Teachers’/school boards have a lack of awareness of students sleep health (or mental health) condition - Schools focus on promoting adolescent (sleep) health besides proving optimal cognitive, educational outcomes. - Schools are there to facilitate learning and getting good grades and adolescent (sleep) health - Schools belief and are aware that they have a large responsibility in stimulating adolescent sleep health | - **Adolescents** learn about sleep health in school with the aim to stimulate their healthy sleep habits - **Schools** integrate sleep health intervention efforts into their curriculum - **Schools** become aware of their students’ sleep health condition - **Schools** monitor students’ sleep health condition regularly - **Schools** actively protect and stimulate the sleep health of their students - **Schools** prioritize overall well-being alongside academic achievement - **Schools** become aware that adolescent sleep health is crucial to healthy adolescent development, cognitive functioning and learning |

*In the research conducted by Heemskerk et al., (16) actions were identified across various system levels using the Action Scales Model (i.e., event level, structure level, goal level, belief level) Nobles et al. (1). These actions served as input for defining the performance objectives. For clarity reasons, the categorization of the performance objective across the ASM levels has been omitted.
