# Supplementary material for: Charge Your Brainzzz: the systematic development of a whole systems action program promoting sleep health in adolescents
Source: Research Square preprint supplement (doi:10.21203/rs.3.rs-5919594/v1), 2025-01-31
Supplement: Supplementary file 5 [file 74d2164b28f9e25ad0d3b377.docx]

Table 4. Overview of the Charge Your Brainzzz implementation materials

| **Implementation materials** | **Practical applications/ Tools** |
| --- | --- |
| **Teachers’ manual for educational program** | This educational component was complemented with an extensive manual for teachers in order to facilitate its implementation. The teacher’s’ manual contains detailed instructions and explanations to help teachers effectively teach the material to students. It includes:   - Lesson plans: Outlines of how to teach each lesson, including objectives, key concepts, and suggested timelines. - Answers and solutions: Correct answers to exercises and problems in the textbook, often with explanations of how to arrive at those answers. - Teaching strategies: Suggestions on how to present the material, engage students, and address different learning styles. - Background information about sleep health to increase awareness about the importance of adolescent sleep health and its causes and consequences |
| **Manual for Healthy School Advisors** | This manual includes information about CYB (e.g., aim, content and planning of the program), information to convince schools to implement CYB within their program (e.g., information about the influence of sleep on school performances), and a list with techniques for schools to overcome barriers during implementation (e.g., time, money, support among school personnel).  Additional materials included factsheets to spread among the schools and to use as a conversation tool with the school and a website to find information about the program. |
| **Charge Your Brainzzz website** | An informative website (www.chargeyourbrainzzz.nl) designed to serve both recipients such as adolescents, and implementers, including education professionals (teachers, school leaders), care professionals (youth health care professionals, school care coordinators), and Healthy School Advisors. The site offers a wide range of resources and information focused on promoting better sleep. It provides educational content about the importance of sleep, practical tips for improving sleep health, detailed information about the CYB program components, and contact options to facilitate enrollment for implementation. |
